# Supplementary material for: IL-8 mediates a positive loop connecting increased neutrophil extracellular traps (NETs) and colorectal cancer liver metastasis
Source: PubMed Central journal article supplement (PMC7255375; doi:10.7150/jca.44215), 2020-05-18
Supplement: jcav11p4384s1.pdf [file jcav11p4384s1.pdf]

**Table S1. Clinical characteristics of patients for NETs analysis of primary tumour site (n=16)**

| <b>Characteristics</b> | <b>N(%)</b> |
|------------------------|-------------|
| Average age            | 61.5        |
| Male/female            | 11/5        |
| Primary site           |             |
| left-sided colon       | 7(44)       |
| right-sided colon      | 8(50)       |
| rectum                 | 1(6)        |
| Tumor stage            |             |
| T1                     | 2(13)       |
| T2                     | 5(31)       |
| T3                     | 4(25)       |
| T4                     | 5(31)       |
| lymph node status      |             |
| N0                     | 3(19)       |
| N1                     | 7(44)       |
| N2                     | 5(31)       |
| Liver metastasis       |             |
| None                   | 10(63)      |
| Yes                    | 6(38)       |

**Table S2. Clinical characteristics of patients for sera MPO-DNA detection (n=41)**

| <b>Characteristics</b> | <b>N(%)</b> |
|------------------------|-------------|
| Average age            | 66.2        |
| Male/female            | 29/12       |
| Primary site           |             |
| left-sided colon       | 21(51)      |
| right-sided colon      | 14(34)      |
| rectum                 | 6(15)       |
| Liver metastasis       |             |
| None                   | 26(63)      |
| Yes                    | 15(37)      |

**Table S3. Clinical characteristics of patients for NETs detection in paired primary site and liver metastasis(n=10)**

|      | Age | Gender | Primary tumor         |         |          | Liver metastasis |                    |
|------|-----|--------|-----------------------|---------|----------|------------------|--------------------|
|      |     |        | Location <sup>a</sup> | T stage | N status | Lesion>3         | Largest lesion>5cm |
| Pt1  | 65  | M      | 1                     | T3      | N1       | y                | n                  |
| Pt2  | 53  | M      | 1                     | T3      | N1       | y                | n                  |
| Pt3  | 59  | F      | 2                     | T4      | N2       | n                | n                  |
| Pt4  | 67  | M      | 1                     | T2      | N1       | n                | n                  |
| Pt5  | 61  | F      | 2                     | T4      | N1       | y                | y                  |
| Pt6  | 72  | M      | 3                     | T4      | N2       | y                | y                  |
| Pt7  | 49  | M      | 2                     | T3      | N1       | n                | n                  |
| Pt8  | 55  | M      | 1                     | T2      | N1       | n                | n                  |
| Pt9  | 58  | F      | 3                     | T4      | N2       | n                | y                  |
| Pt10 | 60  | M      | 2                     | T4      | N2       | n                | y                  |

a: 1:left-sided, 2:right-sided 3:rectum

y: yes n: no

**Table S4. Clinical characteristics of patients for NETs analysis of primary liver cancer (HCC, n=10)**

| <b>Characteristics</b> | <b>N(%)</b> |
|------------------------|-------------|
| Average age            | 65.5        |
| Male/female            | 7/3         |
| HBsAg                  |             |
| Negative               | 4/40        |
| Positive               | 6/60        |
| Liver cirrhosis        |             |
| No                     | 5/50        |
| Yes                    | 5/50        |
| Tumor size             |             |
| ≤ 5cm                  | 7/70        |
| > 5cm                  | 3/30        |
| Tumor number           |             |
| Single                 | 9/90        |
| Multiple               | 1/10        |
| Tumor encapsulation    |             |
| None                   | 7/70        |
| Complete               | 3/30        |
| Vascular invasion      |             |
| No                     | 6/60        |
| Yes                    | 4/40        |

**Table S5. Real-time PCR primers used in the study**

| Primers       | Sequences (5'-3')                                       |
|---------------|---------------------------------------------------------|
| IL-8          | F-CTCCAGCCACACTCCAACAGA<br>R-CACCCTAACACAAAACACGAT      |
| IL-6          | F-CCACGGCCTTCCCTACTTC<br>R-CTGTTGGGAGTGGTATCCTCTGT      |
| TNF- $\alpha$ | F-GACGTGGAAGTGGCAGAAGAG<br>R-TCGGACAAGCAGGAATGAGA       |
| IL-10         | F-AGCCTTGCAGAAAAGAGAGC<br>R-TGGAGTCCAGCAGACTCAAT        |
| IL-1 $\beta$  | F-CTAAAGTATGGGCTGGACTG<br>R-AGCTTCAATGAAAGACCTCA        |
| IL-4          | F-AAGCAAAAAGCCAGCAGCAGCC<br>R-ACAAAGTTTCAGCATAGGAAATTAC |
| MCP-1         | F-TAGGGAAGTTCCACAAAGTTAAAAAC<br>R-GCCACACCAGCACACAGAAG  |
